# Supplementary material
Source: PubMed Central journal article supplement (PMC5757283)
Supplement: EMBR-19-57-s001.pdf [file EMBR-19-57-s001.pdf]

1 **Title:** Lipid Droplet Biogenesis Is Spatially Coordinated at Yeast ER-Vacuole Contact  
2 Sites in Response to Nutritional Stress

3

4 Hanaa Hariri<sup>1</sup>, Sean Rogers<sup>1</sup>, Rupali Ugrankar<sup>1</sup>, Yang Lydia Liu<sup>1</sup>, J. Ryan Feathers<sup>1</sup>, W.  
5 Mike Henne<sup>1,\*</sup>

6

7

8 **Table of Contents** Page

9

10 **Appendix Table S1:** yeast expression plasmids used in this study. 2

11 **Appendix Table S2:** yeast strains utilized in this study. Note: strains are in  
12 SEY6210 background unless otherwise noted. 2

13

14

15

16

17

18

19

20

21

22

23

24

25

26

27

28

29

30

31

32

33

34

35

36

37

38

39

40

41

42

43

44

45 **Appendix Table S1:** yeast expression plasmids used in this study

| <b>Plasmids used for this Study</b> |                                               |                                        |
|-------------------------------------|-----------------------------------------------|----------------------------------------|
| <i>Plasmid</i>                      | <i>Characteristics</i>                        | <i>Origin</i>                          |
| Mdm1-GFP ( <i>pGPD</i> )            | FL Mdm1-GFP with GPD promoter on pBP73G (Ura) | Henne, JCB, 2015                       |
| Erg6-mRed ( <i>pERG6</i> )          | Erg6-mRed (pRS315) (Leu)                      | a kind gift from Dr Joel Goodman, UTSW |
| Faa1-GFP ( <i>pADH</i> )            | GFP-Faa1 on pBP73A ( <i>pADH</i> )            | this study                             |
| Nvj1-mCherry                        | Nvj1-mCherry ( <i>pNVJ1</i> ); pRS315 (Leu)   | this study                             |

46

47

48 **Appendix Table S2:** yeast strains utilized in this study. Note: strains are in SEY6210  
49 background unless otherwise noted.

| <b>Yeast strains used for this Study</b>                                                 |                                                                                                                                            |                                  |
|------------------------------------------------------------------------------------------|--------------------------------------------------------------------------------------------------------------------------------------------|----------------------------------|
| <i>Strain</i>                                                                            | <i>Genotype</i>                                                                                                                            | <i>Origin</i>                    |
| SEY6210 ( <i>wildtype</i> )                                                              | <i>MAT<math>\alpha</math> ura3-52 leu2-3,112 his3-<math>\Delta</math>100 trp1-<math>\Delta</math>901 lys2-801suc2-<math>\Delta</math>9</i> | Scott Emr Lab                    |
| Nvj1-GFP, DsRed-HDEL (ER marker)                                                         | <i>NVJ1-GFP::NATMX DSRED-HDEL::LEU2</i>                                                                                                    | this study                       |
| DsRed-HDEL (ER marker)                                                                   | <i>DSRED-HDEL::LEU2</i>                                                                                                                    | this study                       |
| Mdm1-GFP, Nvj1-mCherry                                                                   | <i>MDM1-GFP::KANMX NVJ1-MCHERRY::TRP1</i>                                                                                                  | this study                       |
| <i>mdm1<math>\Delta</math></i>                                                           | <i>MDM1::KANMX</i>                                                                                                                         | Henne, JCB, 2015                 |
| <i>nvj1<math>\Delta</math></i>                                                           | <i>NVJ1::NATMX</i>                                                                                                                         | this study                       |
| Faa1-mCherry                                                                             | <i>FAA1-MCHERRY::TRP1</i>                                                                                                                  | this study                       |
| <i>faa1<math>\Delta</math></i>                                                           | <i>FAA1::HIS3</i>                                                                                                                          | this study                       |
| <i>mdm1<math>\Delta</math> nvj3<math>\Delta</math></i>                                   | <i>MDM1::KANMX NVJ3::NATMX</i>                                                                                                             | this study                       |
| <i>faa1<math>\Delta</math> mdm1<math>\Delta</math> nvj3<math>\Delta</math></i>           | <i>FAA1::HIS3MDM1::KANMX NVJ3::NATMX</i>                                                                                                   | this study                       |
| GFP-tagged strains for visual screen                                                     | BY4741; all strains have 3'-terminal GFP::HIS3 tag                                                                                         | Yeast GFP collection (Huh, 2003) |
| <i>are1<math>\Delta</math> are2<math>\Delta</math> lro1<math>\Delta</math> pGAL-DGA1</i> | <i>(w303) ARE1::HIS3 ARE2::LEU2 LRO1::URA3 TRP-GAL1-10(PROM) DGA1</i>                                                                      | from Choudhary, JCB, 2015        |

50
