# Supplementary material
Source: PubMed Central journal article supplement (PMC5757283)
Supplement: EMBR-19-57-s002.pdf [file EMBR-19-57-s002.pdf]

### Expanded View Figures

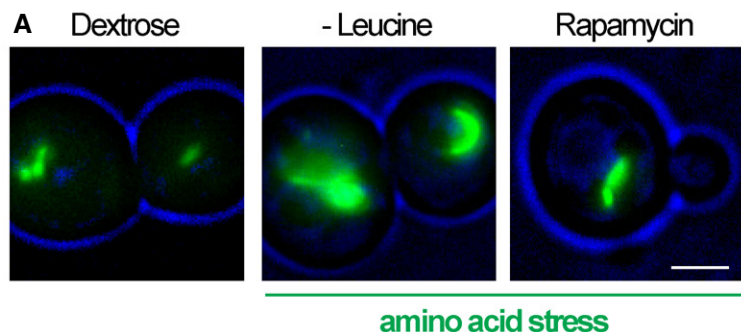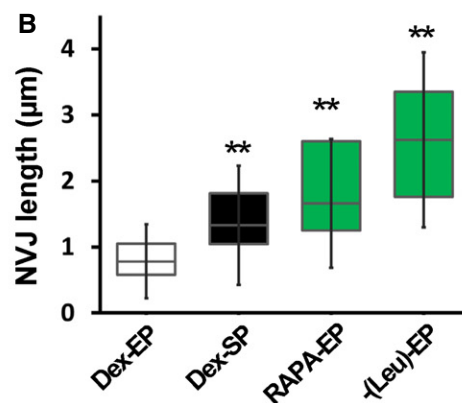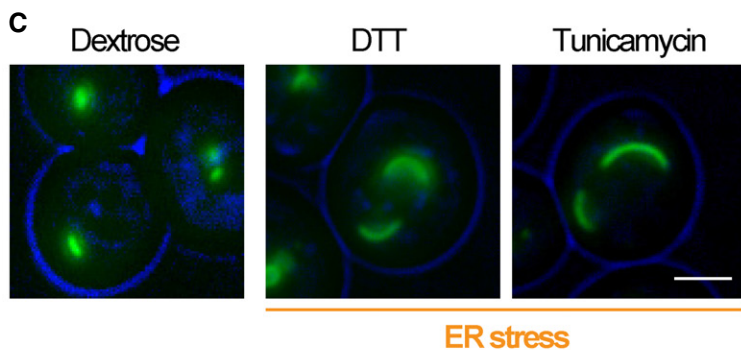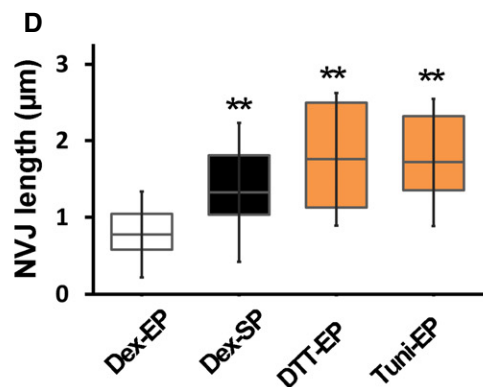

**E**

| Environmental transitions that lead to stress | Average NVJ size (pixels <sup>2</sup> ) |
|-----------------------------------------------|-----------------------------------------|
| <b>Temperature Shock</b>                      |                                         |
| Heat shock                                    | 13.70                                   |
| Cold shock                                    | 13.25                                   |
| <b>pH Extremes</b>                            |                                         |
| Acid                                          | 12.30                                   |
| Alkali                                        | 14.96                                   |
| <b>Starvation</b>                             |                                         |
| Stationary Phase                              | 17.58                                   |
| <b>Non-fermentable carbon</b>                 |                                         |
| Acetate                                       | 21.40                                   |
| <b>Diverse Drug Treatments</b>                |                                         |
| Cerulenin                                     | 13.08                                   |
| Terbinafine                                   | 13.82                                   |
| Dinitrophenol (DNP)                           | 12.52                                   |

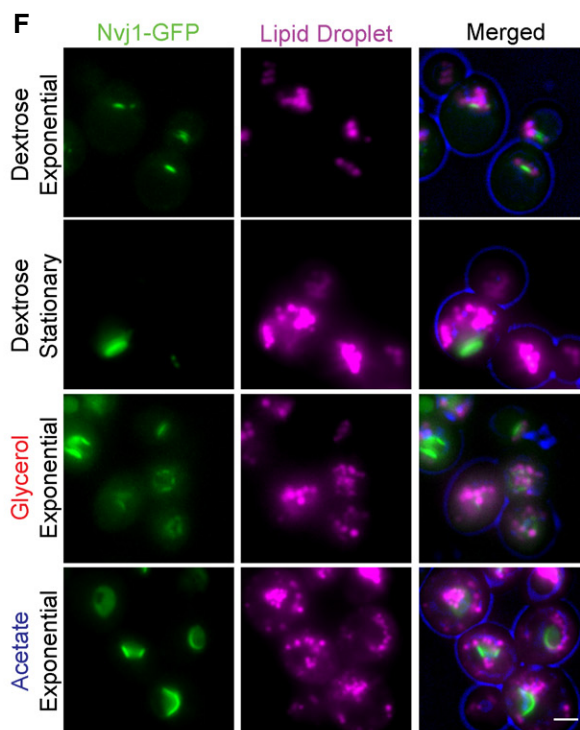

Figure EV1.

**Figure EV1. NVJ contact sites respond to nutrient stress.**

- A Light microscopy for cells expressing chromosomally tagged Nvj1-GFP imaged in amino acid stress. Scale bar, 2  $\mu$ m.  
 B Quantification of the NVJ length ( $\mu$ m) in (A) (box plots of median and range,  $n > 50$  cells,  $**P < 0.005$ , Student's  $t$ -test).  
 C Light microscopy for cells expressing chromosomally tagged Nvj1-GFP imaged in DTT and tunicamycin. Scale bar, 2  $\mu$ m.  
 D Quantification of the NVJ length ( $\mu$ m) in (C) (box plots of median and range,  $n > 50$  cells,  $**P < 0.005$ , Student's  $t$ -test).  
 E Summary table for different stress conditions and their effect on NVJ size based on visual screening. Values are in pixels<sup>2</sup>.  
 F Light microscopy of LDs in yeast expressing chromosomally tagged Nvj1-GFP grown in different conditions. Scale bar, 2  $\mu$ m.

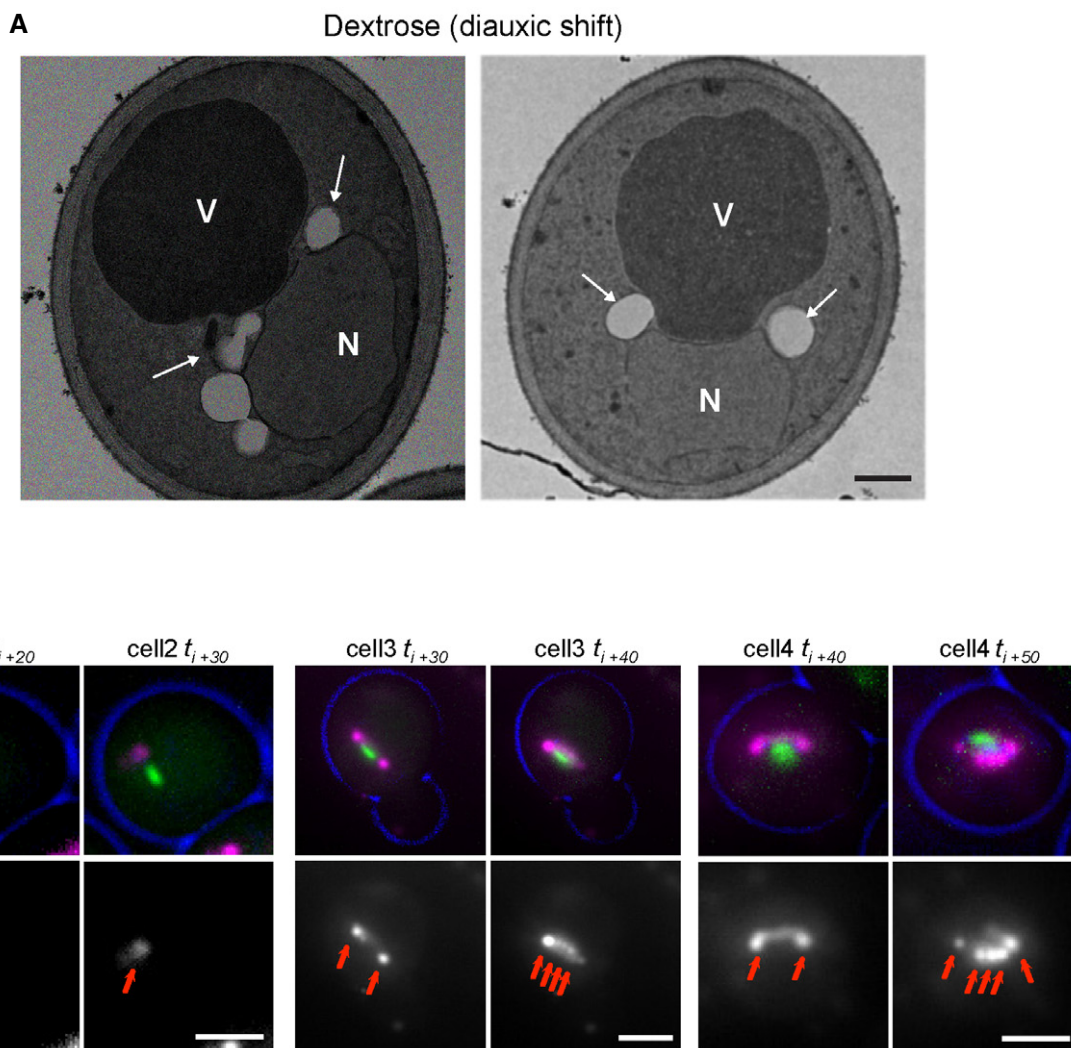**Figure EV2. The NVJ is a site for LD formation.**

- A TEM of WT yeast grown at diauxic shift. Arrows indicate LDs. Scale bar, 0.5  $\mu$ m. N, nucleus; V, vacuole.  
 B Single cells (cell 1, 2, and 3) imaged at different times after cerulenin washout ( $t_i$ ). LDs (arrows) visualized by AutoDOT staining and NVJ visualized by Nvj1-GFP. Scale bar, 2  $\mu$ m.

**Figure EV3. Mdm1 enriches at the NVJ where LD form.**

- A Sequential optical sections of yeast with Mdm1-GFP and Nvj1-mCherry. Arrows indicate sites for Mdm1-GFP enrichment. Scale bar, 2  $\mu\text{m}$ .
- B 3D stacking of optical sections and line trace plot. Arrows indicate sites for Mdm1-GFP enrichment.
- C Light microscopy of yeast mildly over-expressing Mdm1-GFP, with LDs and vacuole labeled using AutoDOT and FM4-64 dye, respectively. Right: Line trace for light microscopy image (yellow line). Scale bar, 2  $\mu\text{m}$ . N, nucleus; V, vacuole.
- D Neutral lipids TLC for WT, *nvj1* $\Delta$ , and *mdm1* $\Delta$  yeast quantified in Fig 4E. SE, sterol esters; TAG, triacylglycerides; FFA, free fatty acids; S, sterols.
- E Top: Dual-labeling imaging for Mdm1-GFP and Faa1-mCherry. Scale bar, 2  $\mu\text{m}$ . Bottom: Line trace for light microscopy (top, yellow line). N, nucleus; V, vacuole.
- F Light microscopy for chromosomally tagged Faa1-GFP in exponential phase. Arrows indicate the ER network. Scale bar, 2  $\mu\text{m}$ . N, nucleus; V, vacuole.
- G Quantification of Faa1-GFP localization in different growth conditions. EP, exponential phase; DS, diauxic shift.

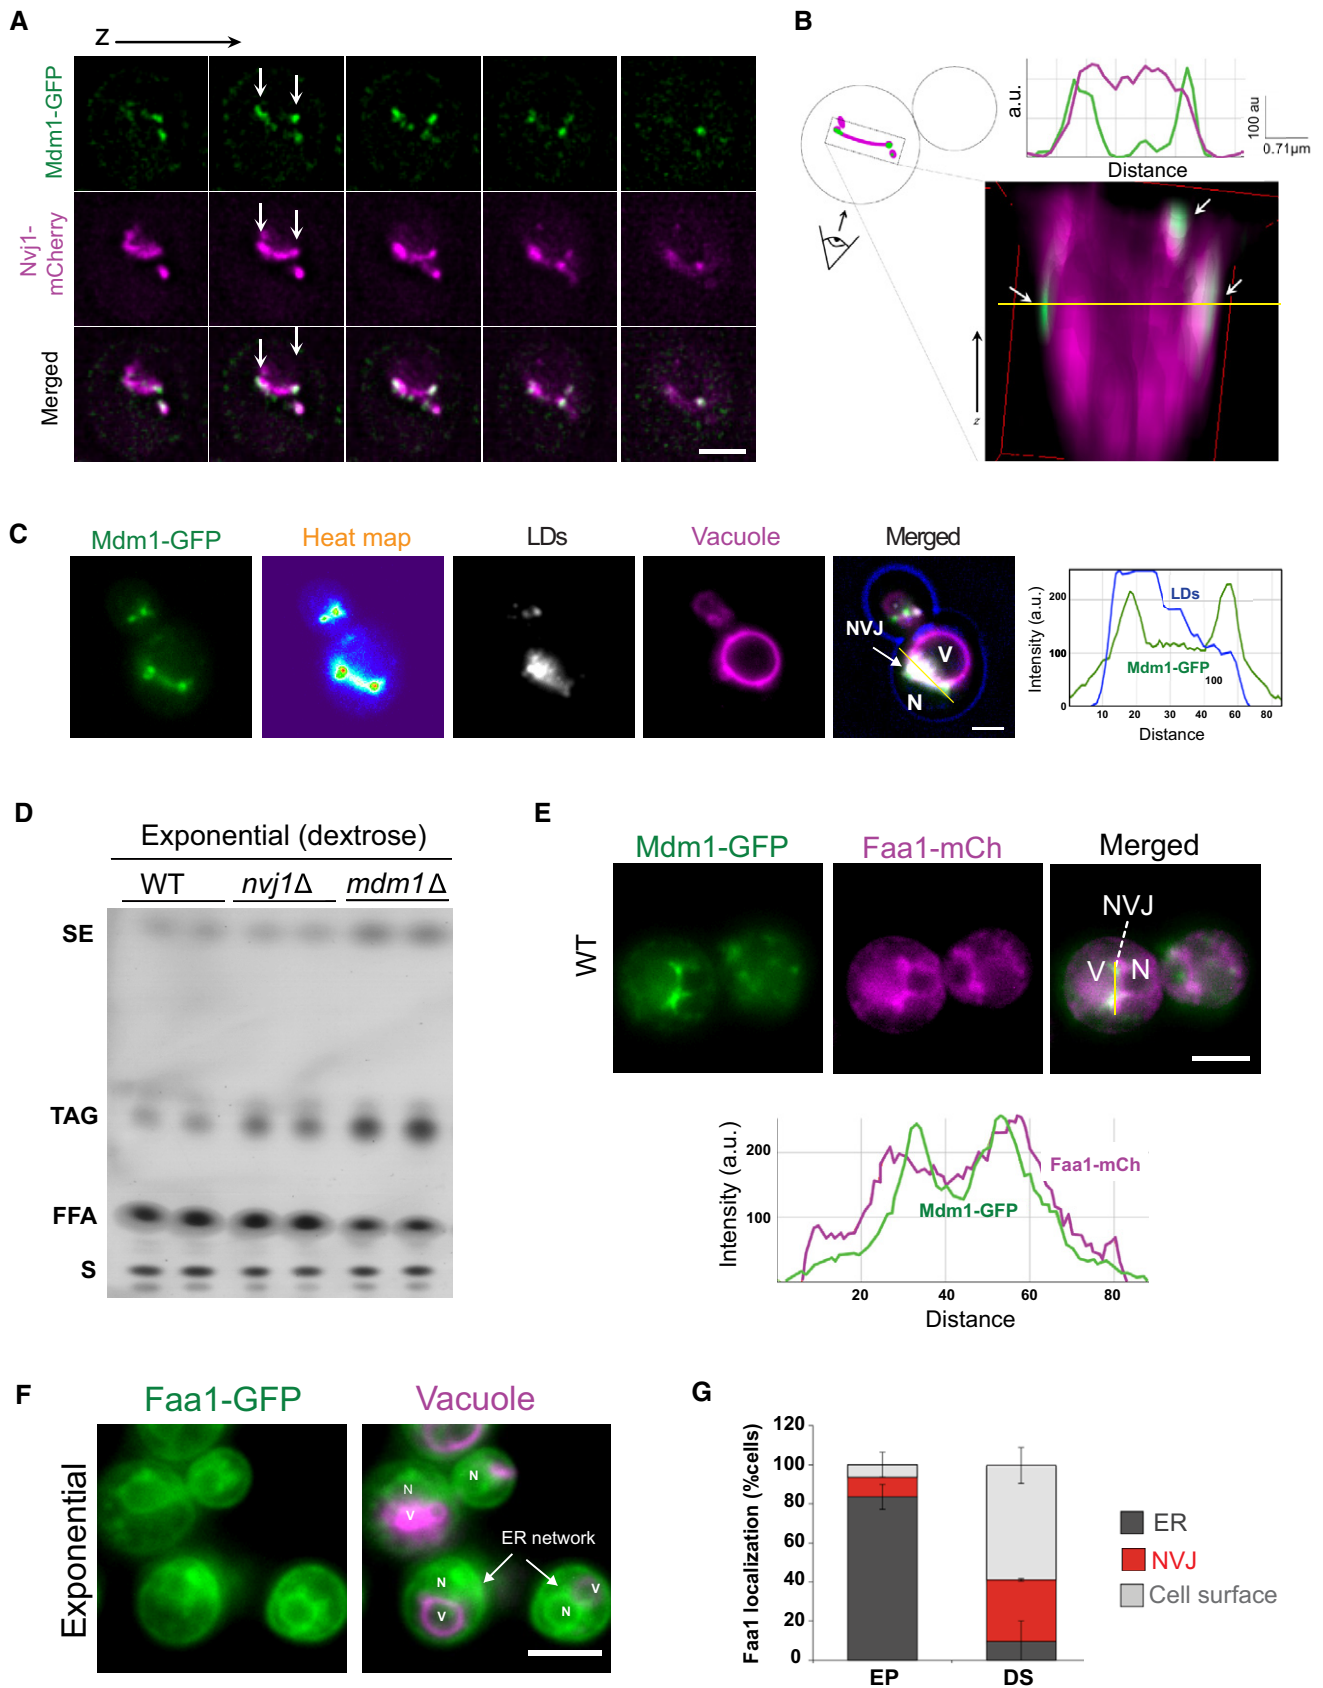

Figure EV3.



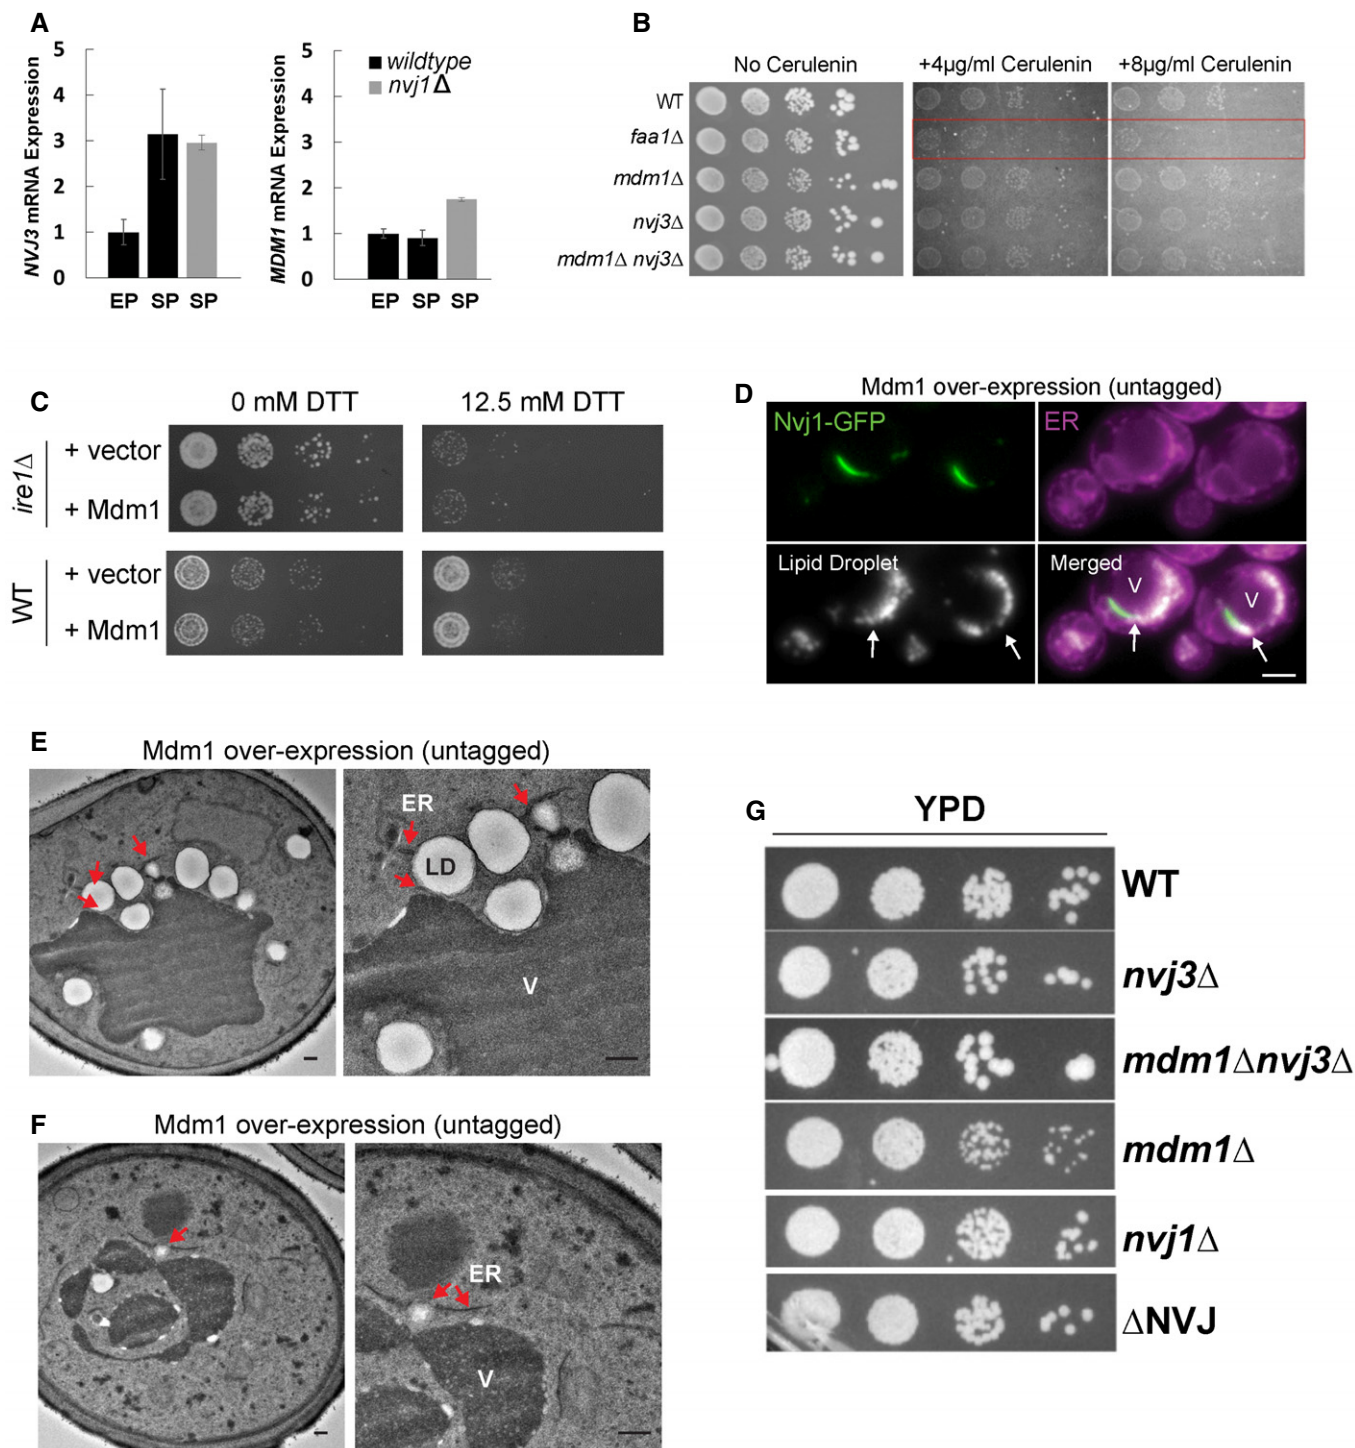

**Figure EV4. Mdm1 modulates LD formation at the ER-vacuole contact sites.**

- A** qRT-PCR showing expression levels of Mdm1 and Nvj3 in *nvj1Δ* yeast cultured in EP and SP (mean  $\pm$  SEM,  $n = 3$  independent cultures per condition, \*\*\* $P < 0.001$ , Student's  $t$ -test). EP, exponential phase; SP, stationary phase.
- B** Plating assay of WT, *faa1Δ*, *mdm1Δ*, *nvj3Δ*, and *mdm1Δnvj3Δ* on plates containing different concentrations of cerulenin.
- C** Growth assays on DTT-containing plates for both wild-type yeast and *ire1Δ* over-expressing Mdm1.
- D** Light microscopy of cells over-expressing untagged Mdm1 show increase LDs that cluster at the NVJ (arrows, visualized by Nvj1-GFP). Scale bar, 2  $\mu$ m. V, vacuole.
- E, F** TEM of WT cells over-expressing untagged Mdm1. Arrows indicate LDs associated with LDs near the vacuole. Scale bar, 0.5  $\mu$ m. V, vacuole.
- G** Plating assay for yeast lacking different NVJ proteins.

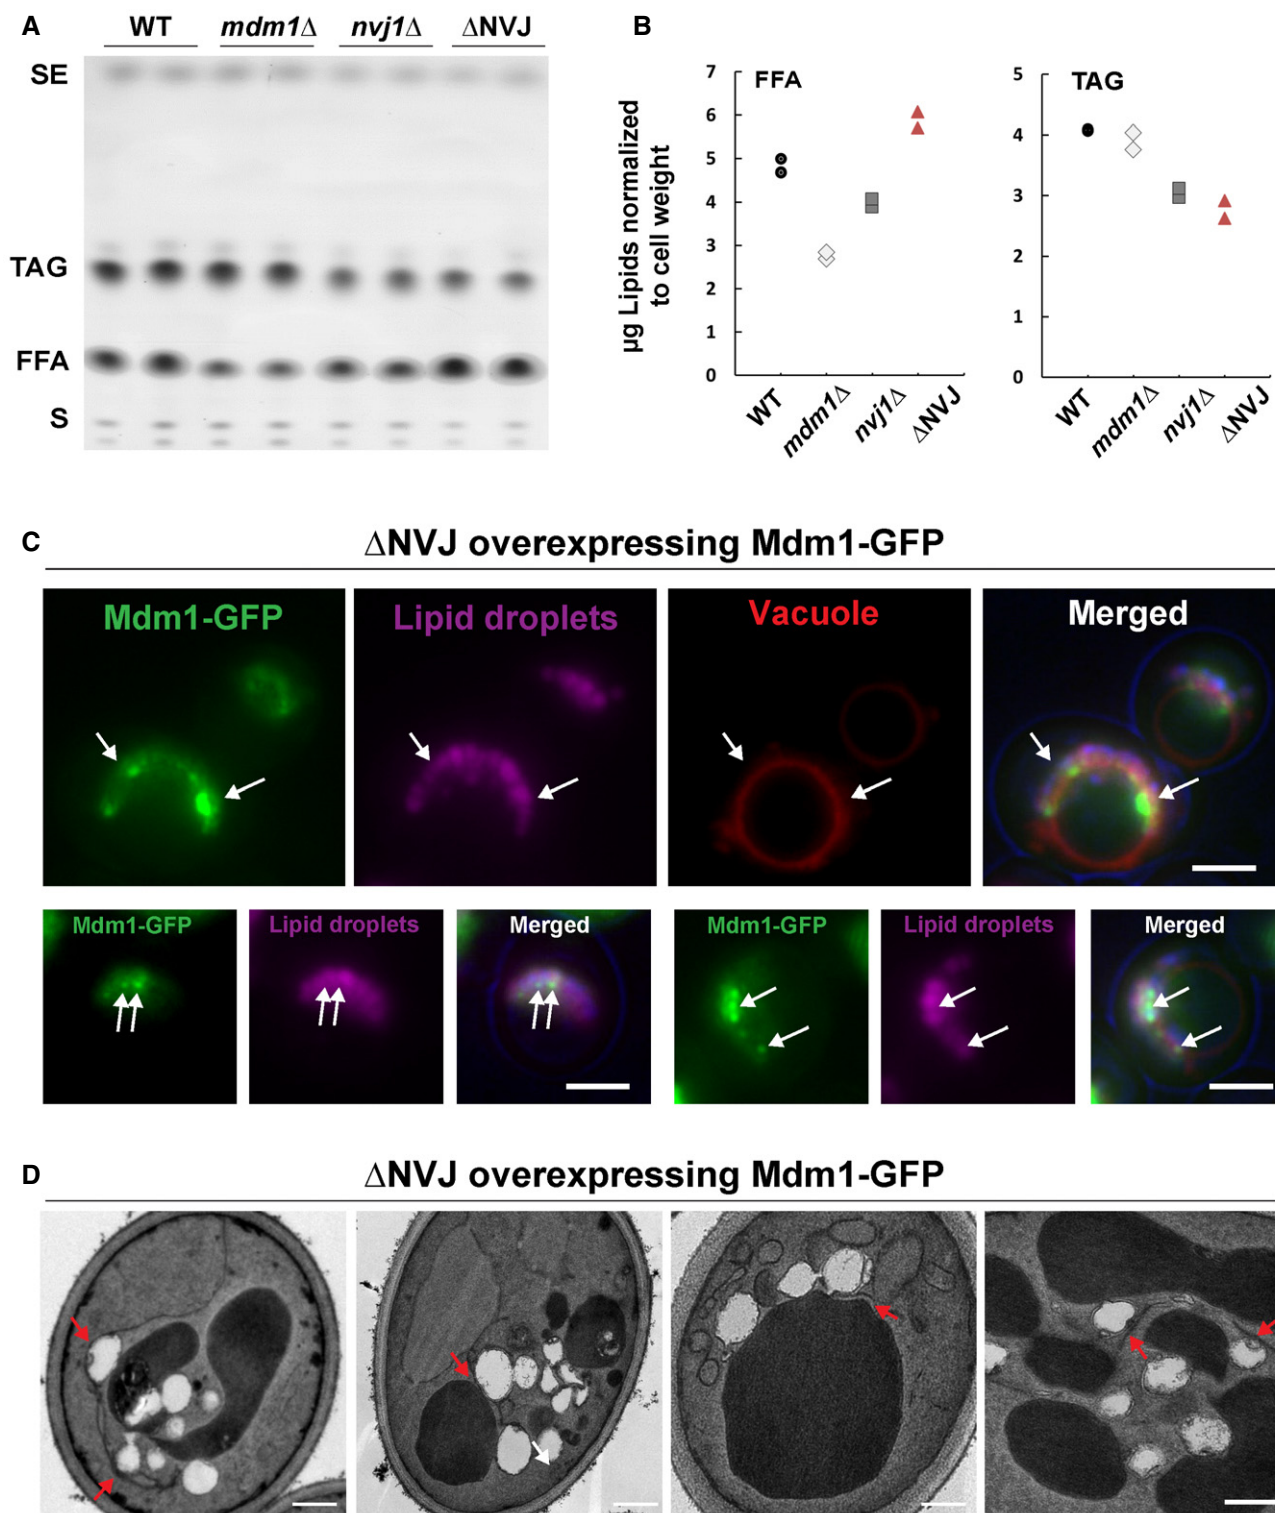

**Figure EV5. Mdm1 marks sites for LD formation.**

A TLC of neutral lipids for WT and mutant yeast fed oleic acid overnight quantified in Fig 7C. SE, sterol esters; TAG, triacylglycerides; FFA, free fatty acids; S, sterols.

B Quantification of FFA and TAG for TLC in (A). The absolute values here correspond to the ratio graphed in Fig 7C.

C Light microscopy of NVJ $\Delta$  yeast over-expressing Mdm1-GFP. LDs are stained with AutoDOT. Arrows point to co-localization of LDs and Mdm1-GFP. Scale bar, 2  $\mu$ m.

D Electron micrographs of NVJ $\Delta$  yeast over-expressing Mdm1-GFP. Arrows indicate ER wrapping LDs near the vacuole. Scale bar, 0.5  $\mu$ m.
